# Supplementary material for: Incidence of COVID-19 in patients treated with infliximab compared with patients treated with rituximab
Source: PubMed Central journal article supplement — RMD Open. 2021 Dec 3;7(3):e001711. doi: 10.1136/rmdopen-2021-001711 (PMC8646967; doi:10.1136/rmdopen-2021-001711), 2021-12-03
Supplement: rmdopen-2021-001711supp001.pdf [file rmdopen-2021-001711supp001.pdf]

## ONLINE SUPPLEMENTARY MATERIALS

Supplementary table 1: Main symptoms consistent with COVID-19 in the study sample.

| Symptoms          | IFX<br>(n=69) | RTX<br>(n=121) | P value |
|-------------------|---------------|----------------|---------|
| Flu-like symptoms | 9(13.0%)      | 4(3.3%)        | 0.016   |
| – Dyspnea         | 5 (7.2%)      | 6(5.0%)        | 0.532   |
| – Ageusia         | 9 (13.0%)     | 9 (7.4%)       | 0.210   |
| – Anosmia         | 2 (2.9%)      | 4(3.3%)        | 1.00    |
| – Fever           | 7(10.1%)      | 7(5.8%)        | 0.387   |
| – Headache        | 4(5.8%)       | 5(4.1%)        | 0.726   |
| – Asthenia        | 2(2.9%)       | 2 (1.7%)       | 0.622   |
| – Cough           | 9(13.0%)      | 8(6.6%)        | 0.185   |
| – Diarrhea        | 1 (1.4%)      | 2(1.7%)        | 1.00    |
| – Sore throat     | 3(4.3%)       | 5(4.1%)        | 1.00    |

**Legend:** IFX = Infliximab. RTX = Rituximab

**Supplementary table 2: Main symptoms consistent with COVID-19 in the validation cohort.**

| <b>Characteristics</b>                | <b>IFX<br/>(n=112)</b> | <b>RTX<br/>(n=94)</b> | <b>P value</b> |
|---------------------------------------|------------------------|-----------------------|----------------|
| Symptoms compatible with COVID-19 (%) | 53 (47.3)              | 43 (45.7)             | 0.889          |
| Hospitalisation (%)                   | 0 (0.0)                | 3 (3.2)               | 0.093          |
| Symptoms reported (%)                 | 112 (100.0)            | 94 (100.0)            | NA             |
| – Fever (%)                           | 19 (17.0)              | 13 (13.8)             | 0.568          |
| – Rhinitis (%)                        | 35 (31.2)              | 25 (26.6)             | 0.539          |
| – Cough (%)                           | 25 (22.3)              | 19 (20.2)             | 0.736          |
| – Muscle aches (%)                    | 21 (18.8)              | 15 (16.0)             | 0.713          |
| – Headache (%)                        | 31 (27.7)              | 20 (21.3)             | 0.332          |
| – Fatigue (%)                         | 32 (28.6)              | 21 (22.3)             | 0.340          |
| – Diarrhoea (%)                       | 9 (8.0)                | 7 (7.4)               | 1.000          |
| – Dyspnoea (%)                        | 14 (12.5)              | 8 (8.5)               | 0.377          |
| – Sore throat (%)                     | 26 (23.2)              | 23 (24.5)             | 0.870          |

**Legend:** RTX=Rituximab, IFX= Infliximab
